# Supplementary material for: Smart Design of Mitochondria-Targeted and ROS-Responsive CPI-613 Delivery Nanoplatform for Bioenergetic Pancreatic Cancer Therapy
Source: MDPI journal article supplement (doi:10.3390/nano11112875), 2021-10-28
Supplement: s1 [file s1]

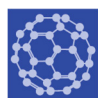

## Supplementary Materials

# Smart Design of Mitochondria-Targeted and ROS-Responsive CPI-613 Delivery Nanoplatform for Bioenergetic Pancreatic Cancer Therapy

Yi-Mei Zhang <sup>1,2</sup>, Meng Xia <sup>1</sup>, Rui Ao <sup>1</sup>, Li-Xia Gao <sup>1</sup>, Yan Tang <sup>1</sup>, Jiu-Hong Huang <sup>1</sup>, Ya-Fei Luo <sup>1</sup>, Zhong-Zhu Chen <sup>1</sup>, Bo-Chu Wang <sup>2</sup> and Zheng Huang <sup>1,\*</sup>

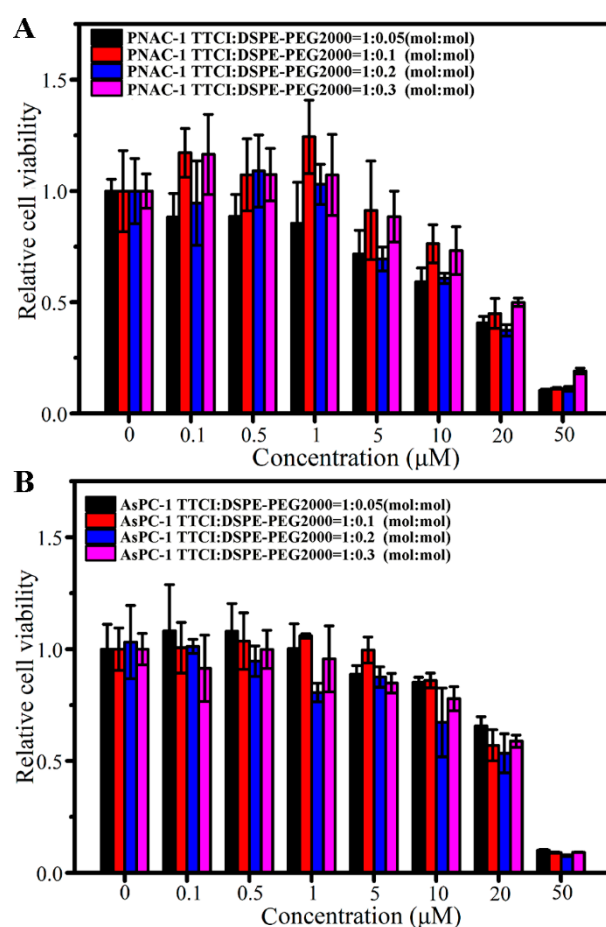

**Figure S1.** In vitro cytotoxicity of TTCl NPs constructed with different molar ratios of TTCl:DSPE-PEG2000 in PNAC-1 (A) and AsPC-1 (B) cells treated with various concentrations for 48 h. Data represent mean  $\pm$  SD ( $n = 3$ ).

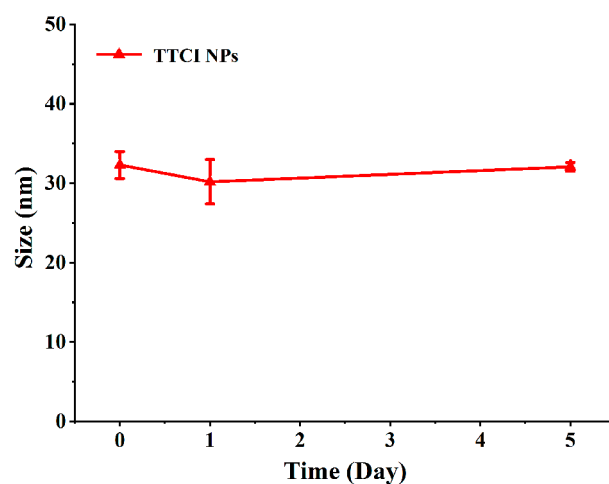

**Figure S2.** Mean particle sizes of TTCl NPs constructed with TTCl:DSPE-PEG2000 at a molar ratio of 1:0.2 at different time points (DLS at room temperature). Data represent mean  $\pm$  SD ( $n = 3$ ).

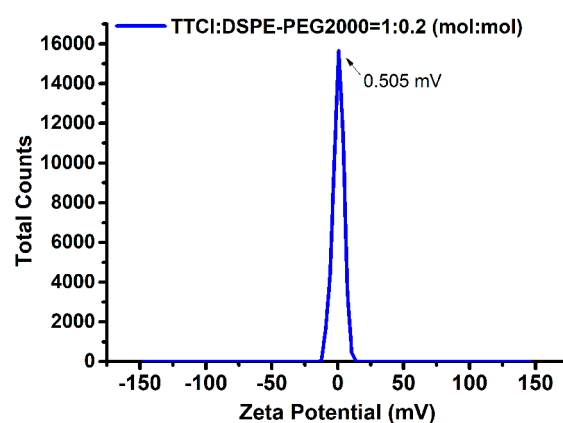

**Figure S3.** Zeta-potentials of TTCl NPs constructed with TTCl:DSPE-PEG2000 at a molar ratio of 1:0.2 (DLS at room temperature).

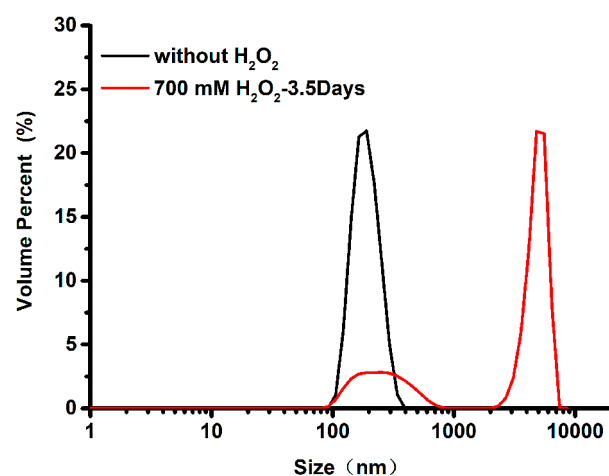

**Figure S4.** Size distribution of TTCh NPs after treatment with 700 mM H<sub>2</sub>O<sub>2</sub> for different time.

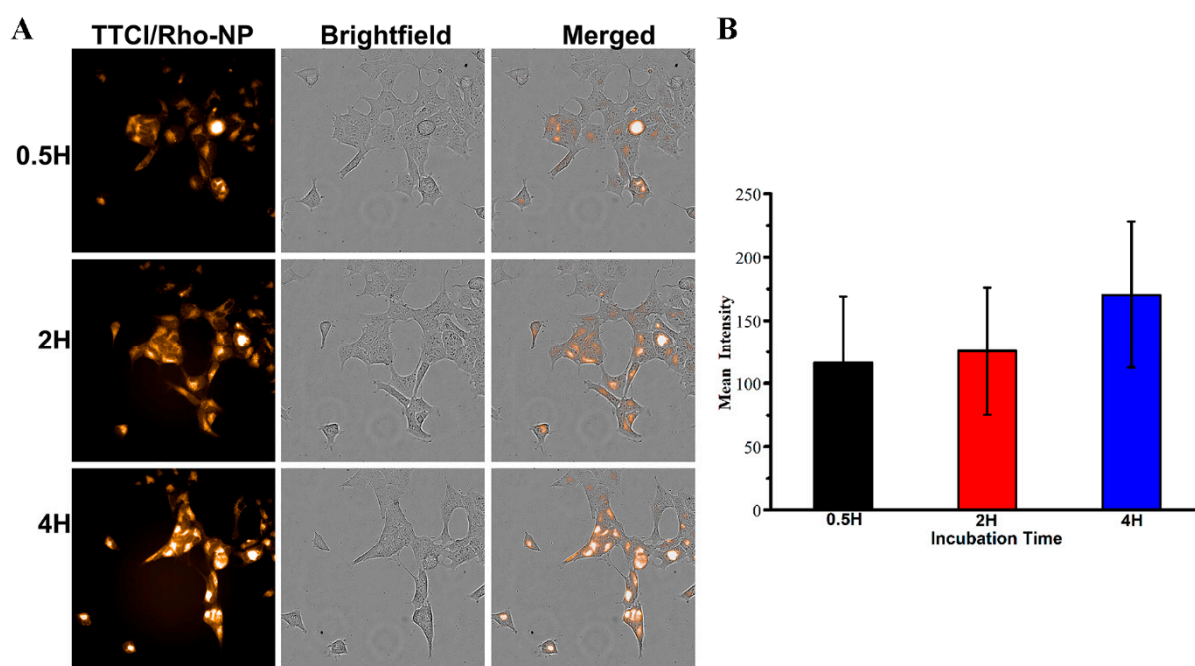

**Figure S5.** Images of the BxPC-3 cells treated with Rhodamine B-loaded **TTCI/Rho** NPs at the concentration of 20  $\mu$ M for 0.5, 2, 4 h, respectively. For each row, left: **TTCI/Rho** NPs; middle: bright field; right: merged image. The images were captured by high content analysis system-operetta CLS<sup>TM</sup> (A). Scale bars: 50  $\mu$ m. the mean intensity of rhodamine fluorescent in the images at different incubation times calculated by the imageJ software (B).

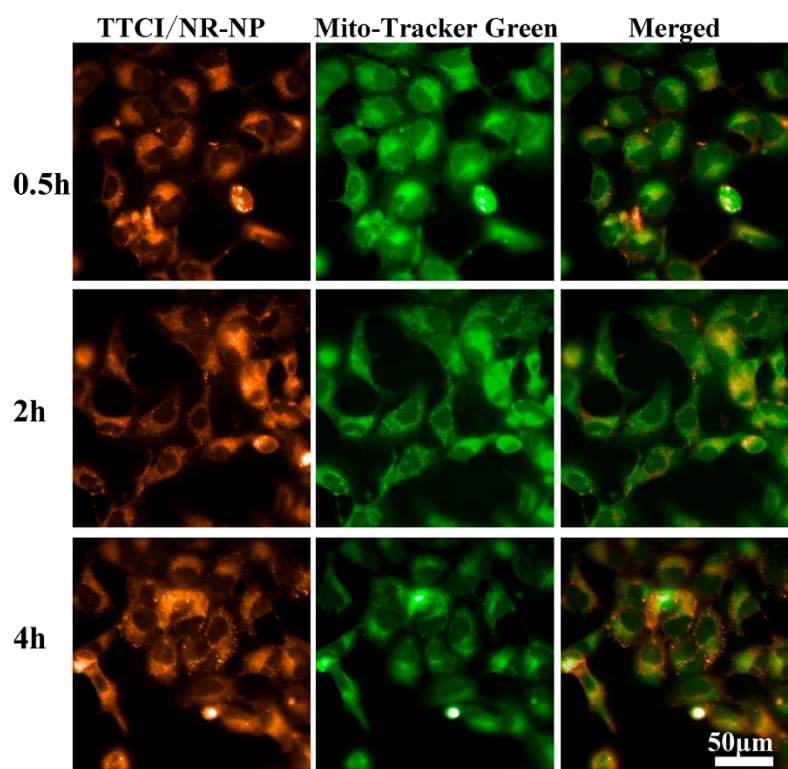

**Figure S6.** Mitochondria-targeting ability of **TTCI/NR** NPs in vitro: Images of the BxPC3 cells treated with **TTCI/NR** NPs at the concentration of 20  $\mu$ M for 0.5, 2 and 4 h captured by high content analysis system-operetta CLS<sup>TM</sup>. For each row, from left to right: **TTCI/NR** NPs; mitochondria stained by MitoTracker Green; merged image. Scale bars: 50  $\mu$ m.

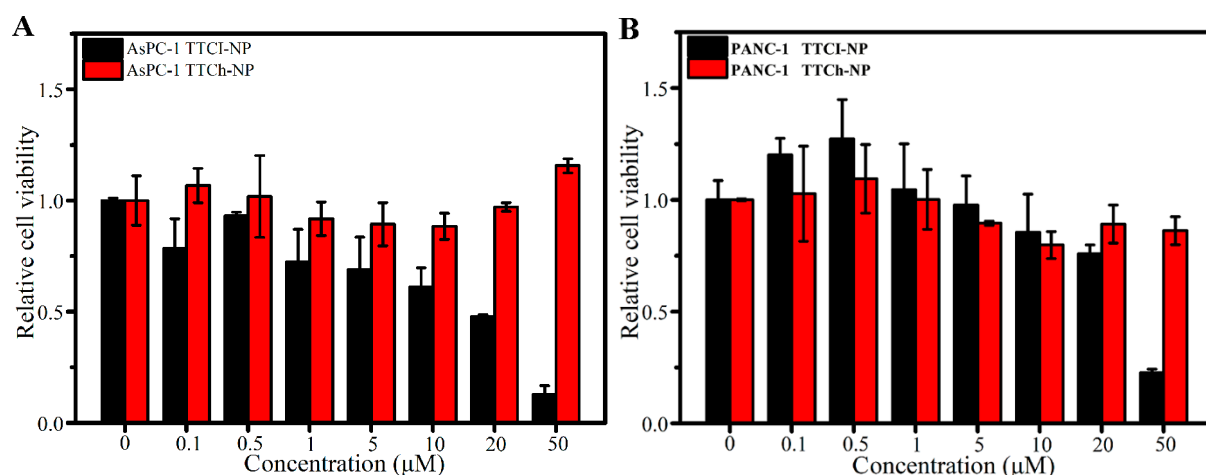

**Figure S7.** Cell viability of AsPC-1 (A) and PANC-1 (B) cells after being treated with different concentration of TTCl NPs and TTCh NPs for 48 h. Data represent mean  $\pm$  SD ( $n = 3$ ).

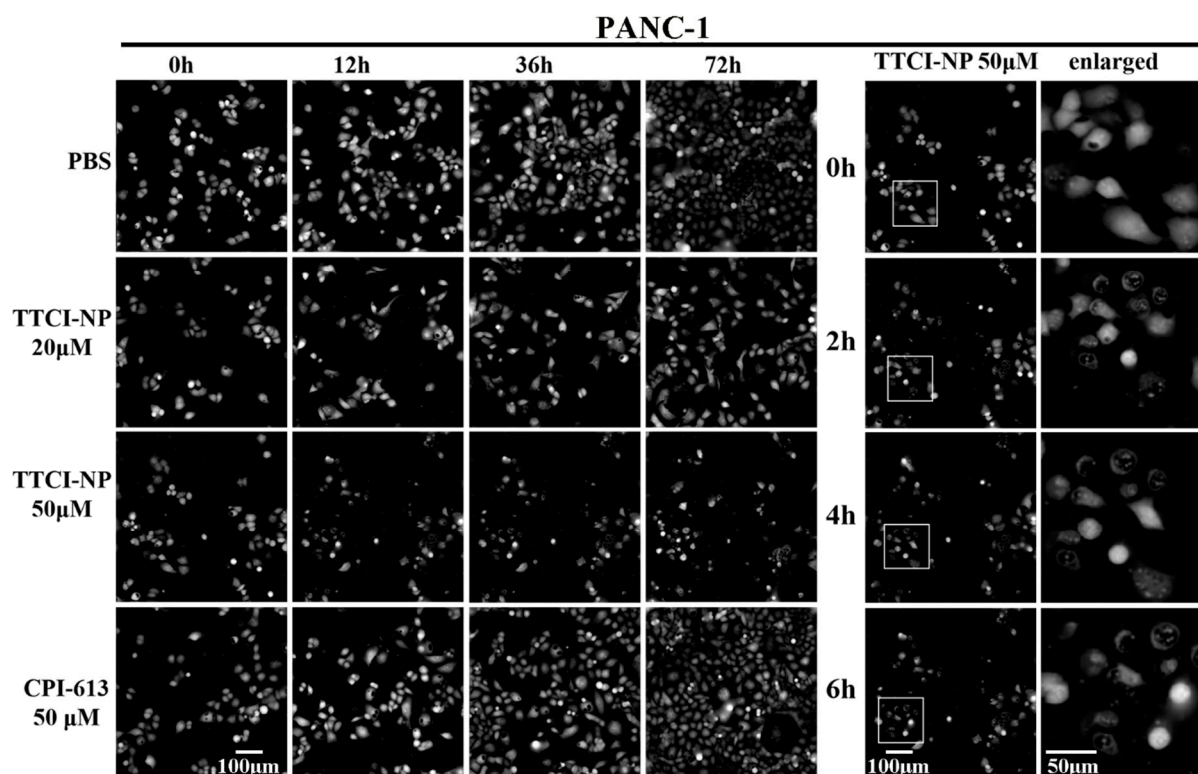

**Figure S8.** Digital phase contrast images of living PANC-1 cells treated with PBS, 20 μM TTCl NPs, 50 μM TTCl NPs and 50 μM CPI-613 at different times. Digital phase contrast images were captured by high content analysis system-operetta CLSTM. Scale bar: 100 μm and 50 μm (for enlarged images).

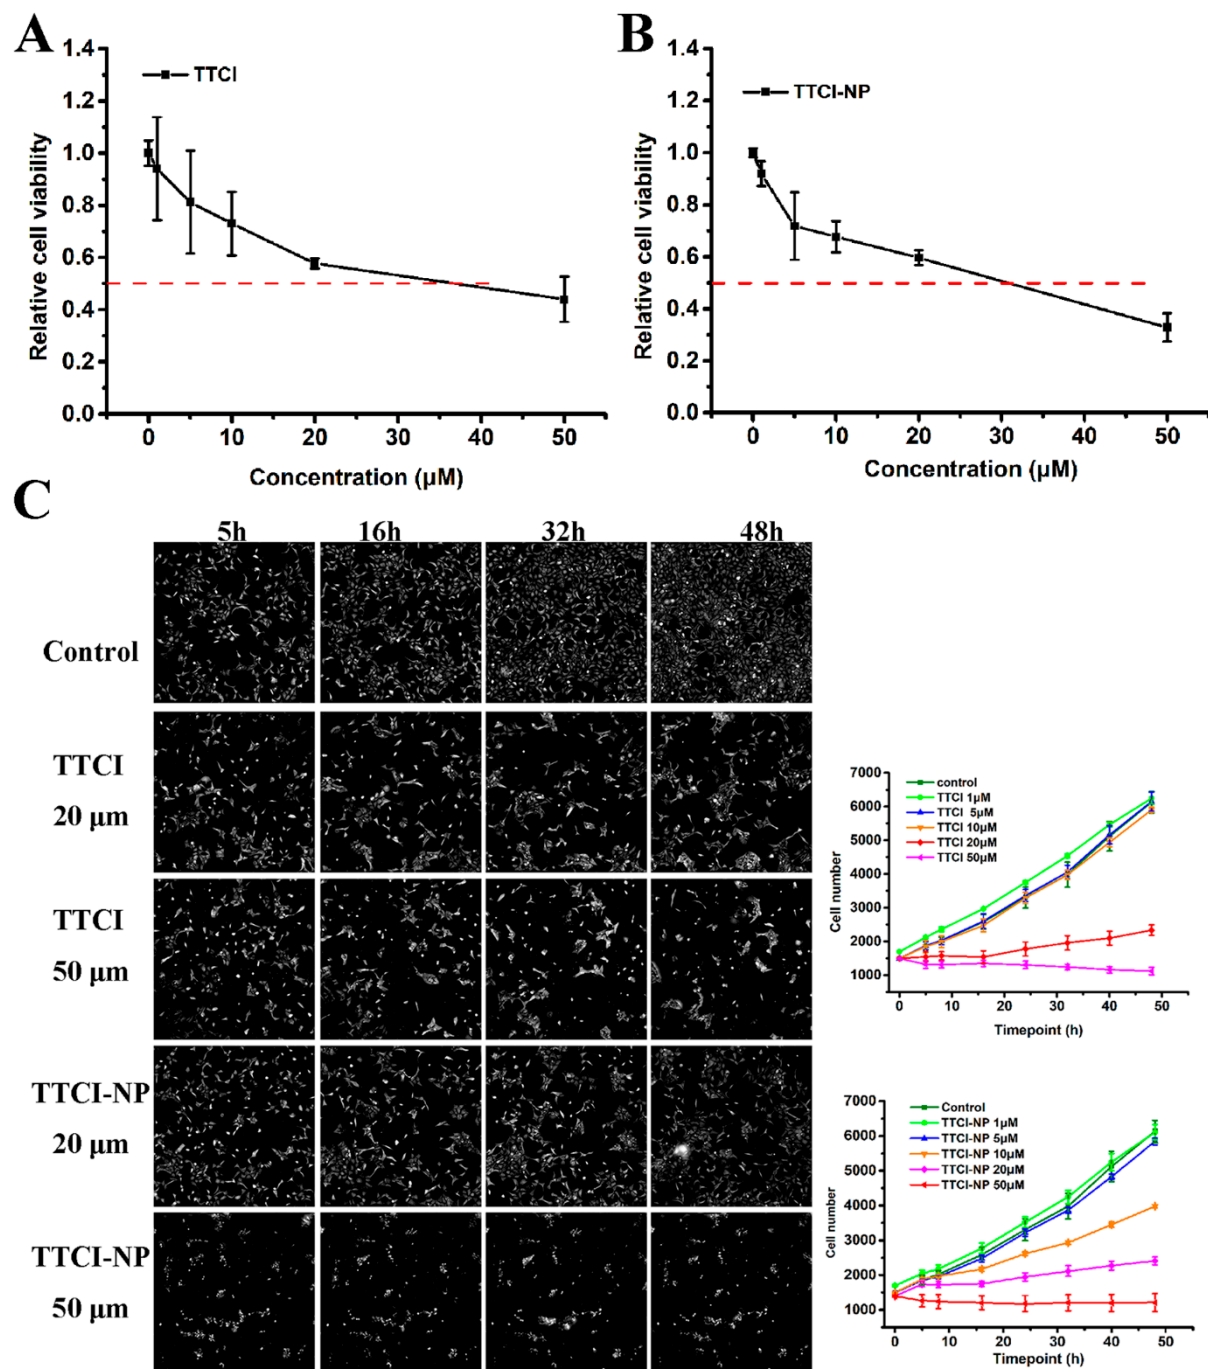

**Figure S9.** In vitro cytotoxicity of TTCl prodrugs (A) and TTCl NPs (B) at various concentrations against BxPC3 cells after 48 h incubation. Digital phase contrast images of living BxPC3 cells were captured by high content analysis system-operetta CLS™ treated with TTCl prodrugs and TTCl NPs at various concentrations (C).
